# Supplementary material
Source: PubMed Central journal article supplement (PMC4309491)
Supplement: cyto0087-0037-sd1.pdf [file cyto0087-0037-sd1.pdf]

Supporting Information Table S1: Details of materials and methods for each of the three participating laboratories according to the MIATA guideline

**Module 1, the cell samples**

|                                                             | Center 1                                                                                                            | Center 2                                                                                         | Center 3                                                                                            |
|-------------------------------------------------------------|---------------------------------------------------------------------------------------------------------------------|--------------------------------------------------------------------------------------------------|-----------------------------------------------------------------------------------------------------|
| <b>Samples</b>                                              |                                                                                                                     |                                                                                                  |                                                                                                     |
| <b>PBMC samples</b>                                         |                                                                                                                     |                                                                                                  |                                                                                                     |
| Donors                                                      | Healthy volunteers from blood bank                                                                                  | Healthy volunteers from blood bank                                                               | Healthy volunteers from blood bank                                                                  |
| Informed consent                                            | Yes                                                                                                                 | Yes                                                                                              | Yes                                                                                                 |
| Source of PBMC                                              | Venipuncture, leukaphereses and buffy coats                                                                         | Venipuncture, leukaphereses and buffy coats                                                      | Venipuncture, leukaphereses                                                                         |
| Anticoagulant                                               | Citrat-Phosphat-Dextrose                                                                                            | Citrat-Phosphat-Dextrose                                                                         | Citrat-Phosphat-Dextrose                                                                            |
| Method for HLA typing                                       | Genomic DNA typing                                                                                                  | Genomic DNA typing                                                                               | Genomic DNA typing                                                                                  |
| CMV seropositivity                                          | Known                                                                                                               | Known                                                                                            | Unknown                                                                                             |
| Transportation and storage                                  | RT                                                                                                                  | RT                                                                                               | RT                                                                                                  |
| Cell processing method                                      | Density gradient separation                                                                                         | Density gradient separation                                                                      | Density gradient separation                                                                         |
| Dilution and washing buffer                                 | Sterile PBS                                                                                                         | Sterile PBS                                                                                      | Sterile PBS                                                                                         |
| Time between blood collection and end of sample processing  | < 6 hrs                                                                                                             | < 6 hrs                                                                                          | < 6 hrs                                                                                             |
| Viability after PBMC isolation                              | > 90%                                                                                                               | > 90%                                                                                            | > 90%                                                                                               |
| <b>Freezing and storage</b>                                 | 90% HI-FBS (Hyclone, Perbio Science, Bonn, Germany), 10% DMSO, freezing container. Long term storage: nitrogen tank | Non-commercial, serum-free freezing medium. Freezing container. Long term storage: nitrogen tank | 90% HI-FBS (Gibco, Naerum, Denmark) 10% DMSO. Freezing container. Long term storage: -150°C freezer |
| N° of PBMC frozen per vial                                  | 15 - 20 x10 <sup>6</sup>                                                                                            | 20 x 10 <sup>6</sup>                                                                             | 5 - 20 x10 <sup>6</sup>                                                                             |
| <b>TIL samples</b>                                          |                                                                                                                     |                                                                                                  |                                                                                                     |
| Donors                                                      |                                                                                                                     |                                                                                                  | HLA-A*02 cancer patients                                                                            |
| Informed consent                                            |                                                                                                                     |                                                                                                  | Yes                                                                                                 |
| Source of cells                                             |                                                                                                                     |                                                                                                  | Melanoma lesions                                                                                    |
| Transportation and storage                                  |                                                                                                                     |                                                                                                  | Culture medium                                                                                      |
| Cell processing method                                      |                                                                                                                     |                                                                                                  | Mechanical disruption                                                                               |
| Time between tissue collection and end of sample processing |                                                                                                                     |                                                                                                  | Within 2 hours                                                                                      |
| Cell culture                                                |                                                                                                                     |                                                                                                  | CD3 mAb + IL-2 + allogenic feeders                                                                  |
| Freezing and storage                                        |                                                                                                                     |                                                                                                  | See PBMC                                                                                            |
| N° of TIL frozen per vial                                   |                                                                                                                     |                                                                                                  | 15 - 50 x10 <sup>6</sup>                                                                            |

| <b>Cell thawing and counting</b>      |                                                                                                                                                            |                                                                                                                                      |                                                                                                                                                                                                                   |
|---------------------------------------|------------------------------------------------------------------------------------------------------------------------------------------------------------|--------------------------------------------------------------------------------------------------------------------------------------|-------------------------------------------------------------------------------------------------------------------------------------------------------------------------------------------------------------------|
| Medium and procedure used for thawing | IMDM 2.5% HI-HS, Pen/Strep, $\beta$ -mercaptoethanol 0.05mM, DNase 3 $\mu$ g/ml (Sigma)<br>Thaw vial in water bath, transfer to warm medium and centrifuge | CTL-Wash, L-Glutamine, Benzonase 5000 U/ml (Merck, Darmstadt, Germany)<br>Thaw vial in water bath, transfer to medium and centrifuge | RPMI, 10% HI FBS<br>Optional addition: 0.025 mg/ ml Pulmozyme (Roche, Hvidovre, Denmark) and 2.5 mM MgCl <sub>2</sub><br>Thaw the content of the vial through dilution with preheated (37°C) media and centrifuge |
| Resting phase before assay            | No                                                                                                                                                         | No                                                                                                                                   | No                                                                                                                                                                                                                |
| Serum pretested                       | Yes                                                                                                                                                        | n.a.                                                                                                                                 | No                                                                                                                                                                                                                |
| Viability after thawing               | > 80%                                                                                                                                                      | > 80%                                                                                                                                | >80% for PBMC, >60% for TIL                                                                                                                                                                                       |
| Cell counting method                  | trypan blue                                                                                                                                                | trypan blue + Turk's solution                                                                                                        | trypan blue                                                                                                                                                                                                       |

## Module 2, the assay

|                                                                                             | Center 1                                                                           | Center 2                                                                           | Center 3                                                                                                                     |
|---------------------------------------------------------------------------------------------|------------------------------------------------------------------------------------|------------------------------------------------------------------------------------|------------------------------------------------------------------------------------------------------------------------------|
| <b>Assay</b>                                                                                |                                                                                    |                                                                                    |                                                                                                                              |
| <b>HLA-monomer production and storage</b>                                                   |                                                                                    |                                                                                    |                                                                                                                              |
| Peptide source                                                                              | Kindly provided by S. Stevanović                                                   | Kindly provided by P. Lewandrowski                                                 | Purchased from Pepscan, Lelystad, NL                                                                                         |
| Method                                                                                      | Refolding according to Altman et al.                                               | Refolding according to Altman et al.                                               | Refolding with a conditional ligand                                                                                          |
| Final concentration ( $\mu$ g/ml)                                                           | 2000                                                                               | 2000                                                                               | 2000-3000                                                                                                                    |
| Buffer (excl. further additives NaN <sub>3</sub> , EDTA, or protease inhibitors)            | 20 mM Tris pH=8                                                                    | 20 mM Tris pH=8                                                                    | PBS                                                                                                                          |
| Storage t°                                                                                  | -80°C                                                                              | -80°C                                                                              | -80°C with 16% glycerol                                                                                                      |
| <b>MHC multimer production and storage</b>                                                  |                                                                                    |                                                                                    |                                                                                                                              |
| Ratio Streptavidin-fluorochrome / HLA-monomer                                               | 4/1 for Strep-PE and -APC<br>1/30 for Strep-QD (all Invitrogen Darmstadt, Germany) | 4/1 for Strep-PE and -APC<br>1/30 for Strep-QD (all Invitrogen Darmstadt, Germany) | 4/1 for Strep-PE and -APC<br>1/30 for Strep-QD (Strep-PE, -APC, PE-Cy7, BioLegend, Copenhagen, Denmark, Strep-QD Invitrogen) |
| Add biotin for blocking free Streptavidin                                                   | Only for Strep-QD multimers<br>D-biotin (Sigma) 28 $\mu$ M final                   | D-Biotin 25 $\mu$ M final (Sigma)                                                  | D-Biotin 25 $\mu$ M final (Sigma)                                                                                            |
| MHC multimer concentration before cryopreservation ( $\mu$ g/ml based on MHC concentration) | Multimer-PE 480; Multimer-APC 730<br>Multimer-QD 100                               | Mult-PE 497; Mult-APC 760<br>Mult-QD 836                                           | Single color MHC multimer analyses 10; Combinatorial encoded MHC multimer panels 100                                         |
| Final glycerol for freezing                                                                 | 16%                                                                                | range: 0 -16%                                                                      | range: 0 -16%                                                                                                                |

|                                                                      |                                                                                                                                                       |                                                                                                                                                                                            |                                                                                                                                                      |
|----------------------------------------------------------------------|-------------------------------------------------------------------------------------------------------------------------------------------------------|--------------------------------------------------------------------------------------------------------------------------------------------------------------------------------------------|------------------------------------------------------------------------------------------------------------------------------------------------------|
| Others reagents contained in the HLA-multimer freezing buffer        | 0.02% NaN <sub>3</sub><br>0.5% HSA (Biotest, Dreieich, Germany)<br>1X Complete Protease inhibitor (Roche, Grenzach-Wyhlen, Germany)                   | 0.02%NaN <sub>3</sub><br>0.5% BSA (Sigma)<br>1X Complete Protease inhibitors (Roche, Grenzach-Wyhlen, Germany)                                                                             | 0.02%NaN <sub>3</sub><br>0.5% BSA (Sigma)                                                                                                            |
| Frozen MHC multimer concentration (µg/ml based on HLA concentration) | Mult-PE 321; mult-APC 488<br>Mult-QD 66                                                                                                               | Mult-PE 367; mult-APC 591<br>Mult-QD 650                                                                                                                                                   | 10 for single color staining;<br>100 for combinatorial staining;                                                                                     |
| Procedure for freezing /thawing multimers                            | Add concentrated freezing solution, mix gently and aliquot on ice. Transfer aliquots to -80°C.<br>Thaw aliquots on ice without direct light exposure. | Add concentrated freezing solution mix gently and aliquot on ice. Transfer aliquots to -80°C.<br>Thaw aliquots on ice without direct light exposure.                                       | Add concentrated freezing solution mix gently and aliquot on ice. Transfer aliquots to -80°C.<br>Thaw aliquots on ice without direct light exposure. |
| Storage t°                                                           | -80°C                                                                                                                                                 | -80°C                                                                                                                                                                                      | -20°C or -80°C                                                                                                                                       |
| <b>Staining</b>                                                      |                                                                                                                                                       |                                                                                                                                                                                            |                                                                                                                                                      |
| Number of cells stained                                              | 1.5 x 10 <sup>6</sup> /test                                                                                                                           | 0.4 - 5 x 10 <sup>6</sup> /test                                                                                                                                                            | 0.5 - 3 x 10 <sup>6</sup> /test PBMC<br>0.2 - 1 x 10 <sup>6</sup> /test TIL                                                                          |
| Staining volume                                                      | 50 µl                                                                                                                                                 | 50 – 100 µl                                                                                                                                                                                | 50 – 100 µl                                                                                                                                          |
| MHC multimer concentration (based on HLA concentration)              | 5 µg/ml                                                                                                                                               | 5 µg/ml for single color staining<br>5 - 10 µg/ml for combinatorial staining.                                                                                                              | 1 µg/ml for single color staining<br>2 µg/ml for combinatorial staining                                                                              |
| MHC multimer combinations                                            | 1 fluorochrome per multimer                                                                                                                           | 1 fluorochrome per multimer or combinatorial staining                                                                                                                                      | 1 fluorochrome per multimer or combinatorial staining                                                                                                |
| MHC multimer dilution buffer                                         | PBS + 50% HI FBS + 2 mM EDTA + 0.02% NaN <sub>3</sub>                                                                                                 | PBS + 50% HI FBS+ 2 mM EDTA + 0.02% NaN <sub>3</sub>                                                                                                                                       | PBS + 2% FBS + 2 mM EDTA + 0.02% NaN <sub>3</sub>                                                                                                    |
| Centrifugation of diluted MHC multimer                               | 14000 g, 5 min, 4°C                                                                                                                                   | 13000 g, 2 hrs, 4°C                                                                                                                                                                        | 3300g, 5 min, RT                                                                                                                                     |
| Incubation conditions                                                | 1 <sup>st</sup> step, 30 min, RT                                                                                                                      | 2 <sup>nd</sup> step, 30 min, 4°C                                                                                                                                                          | 1 <sup>st</sup> step, 15 min, 37°C                                                                                                                   |
| mAbs                                                                 | CD8-PE-Cy7 SFC121Thy2D3 (Beckman Coulter, Krefeld, Germany)                                                                                           | In combination with dump channel: CD8-AF700 HIT-8a, (BD Biosciences, Heidelberg, Germany) without dump channel: CD8 FITC SK1, CD3 Pacific Blue UCHT1 (BD Biosciences, Heidelberg, Germany) | CD8-Alexa Fluor F700 HIT8a (Biolegend) or CD8-PerCP SK1 (Biolegend)                                                                                  |
| Dump channel                                                         | CD4-FITC HP2/6 (homemade)                                                                                                                             | If used: CD4-FITC SK3, CD14-FITC MφP9, CD16-FITC NKP15, CD19-FITC 4G7, CD40-FITC LOB7/6 (BD Biosciences)                                                                                   | CD4-FITC SK3, CD14-FITC MφP9, CD16-FITC NKP15, CD19-FITC 4G7, CD40-FITC LOB7/6 (BD Biosciences, Albertslund, Denmark)                                |
| mAb dilution buffer                                                  | PBS + 2% HI FBS + 2 mM EDTA +                                                                                                                         | PBS + 2% HI FBS + 2mM EDTA +                                                                                                                                                               | PBS 1X + 2% FBS + 2mM EDTA +                                                                                                                         |

|                                      |                                                                     |                                                                                     |                                                                                                      |
|--------------------------------------|---------------------------------------------------------------------|-------------------------------------------------------------------------------------|------------------------------------------------------------------------------------------------------|
|                                      | 0.02% NaN <sub>3</sub>                                              | 0.02% NaN <sub>3</sub>                                                              | 0.02% NaN <sub>3</sub>                                                                               |
| Incubation condition                 | 2 <sup>nd</sup> step, 20 min, 4°C                                   | 3 <sup>rd</sup> step, 20 min, 4°C                                                   | 2 <sup>nd</sup> step, 30 min, 4°C                                                                    |
| Dead cell dye                        | LIVE/DEAD aqua (Invitrogen)                                         | LIVE/DEAD fixable near-IR or aqua dead cell stain kit (Invitrogen)                  | LIVE/DEAD fixable near-IR dead cell stain kit (Invitrogen)                                           |
| Dilution buffer                      | PBS                                                                 | PBS                                                                                 | PBS 1X + 2% FBS + 2mM EDTA + 0.02% NaN <sub>3</sub>                                                  |
| Incubation step                      | 3 <sup>rd</sup> step alone, 30 min, 4°C                             | 1 <sup>st</sup> step alone, 20 min, 4°C                                             | 2 <sup>nd</sup> step together with mAb, 30 min, 4°C                                                  |
| Sample fixation                      | Formaldehyde 1%, no following wash                                  | BD FACS permeabilizing Solution 2 RT for 10 min, then wash with mAb dilution buffer | No fixation                                                                                          |
| <b>Staining with spiked glycerol</b> |                                                                     |                                                                                     |                                                                                                      |
| Final concentrations                 | 16 - 0.5%                                                           | 16 - 0.5%                                                                           | 16 - 0.5%                                                                                            |
| Staining step                        | 1 <sup>st</sup> step, 30 min, RT together with multimer, before mAb | 1 <sup>st</sup> step, 30 min, 4°C, before staining procedure                        | 1 <sup>st</sup> step, 15 min, 37°C together with multimer and 2 <sup>nd</sup> step together with mAb |

### Module 3, data acquisition

|                                             | Center 1                                      | Center 2                                                     | Center 3                                                     |
|---------------------------------------------|-----------------------------------------------|--------------------------------------------------------------|--------------------------------------------------------------|
| <b>Data acquisition</b>                     |                                               |                                                              |                                                              |
| Flow cytometer                              | BD Canto II                                   | BD LSR II SORP                                               | BD LSR II SORP                                               |
| Software for acquisition                    | Diva                                          | Diva                                                         | Diva                                                         |
| Instrument settings and performance control | CS&T beads, compensation with beads and cells | CS&T beads, daily performance check, compensation with beads | CS&T beads, daily performance check, compensation with beads |
| Number of cells acquired                    | All in the test tube                          | Up to 5 x 10 <sup>6</sup>                                    | Up to 1 x 10 <sup>6</sup> lymphocytes or all in the tube     |

### Module 4, data processing

|                                                                          | Center 1                                                      | Center 2                                                      | Center 3                                                             |
|--------------------------------------------------------------------------|---------------------------------------------------------------|---------------------------------------------------------------|----------------------------------------------------------------------|
| <b>Data processing</b>                                                   |                                                               |                                                               |                                                                      |
| Software for analysis                                                    | Flow Jo 7.2 (Treestar, Ashland, OR)                           | Flow Jo 9.5.2 (Treestar)                                      | Diva Software v6.1.3                                                 |
| Gating strategy for measurements of viability and CD8 <sup>+</sup> cells | Time histogram, singlets FSC-A/H, lymphos FSC-A/SSC-A, living | Time histogram, singlets FSC-A/H, lymphos FSC-A/SSC-A, living | Time histogram, singlets FSC-A/H, lymphos FSC-A/SSC-A, dead cell dye |

|                                                               |                                                                       |                                                                                |                                                                                                                                                                     |
|---------------------------------------------------------------|-----------------------------------------------------------------------|--------------------------------------------------------------------------------|---------------------------------------------------------------------------------------------------------------------------------------------------------------------|
|                                                               | lymphos FSC-A/dead cell dye, CD8 histogram (marker CD8 <sup>+</sup> ) | lymphos FSC-A/dead cell dye, CD8/dump channel (gate CD8 <sup>+</sup> )         | (histogram), CD8/dump channel (gate CD8 <sup>+</sup> )                                                                                                              |
| Gating strategy for measurements of MHC multimer+ CD8 T cells | Time, singlets, lymphos, CD4/CD8, CD8/MHC multimer quadrants or gates | Time, singlets, lymphos, CD8/dump channel, CD8/MHC multimer quadrants or gates | Time, singlets, lymphos, living cells, CD8/dump channel (CD4, CD14, CD16, CD19, CD40), CD8/MHC multimer quadrants or gates. For combinatorial staining, see (16,18) |
| Gating between experiments                                    | Gates and quadrants had to be slightly adapted                        | Gates and quadrants had to be slightly adapted                                 | Gates and quadrants had to be slightly adapted                                                                                                                      |
| Any data excluded                                             | No                                                                    | No                                                                             | No                                                                                                                                                                  |
| Positivity criteria                                           | n.a.                                                                  | n.a.                                                                           | n.a.                                                                                                                                                                |
| Dot-plots provided on demand                                  | Yes                                                                   | Yes                                                                            | Yes                                                                                                                                                                 |

### Module 5, general lab operation

|                                     | Center 1                  | Center 2             | Center 3                  |
|-------------------------------------|---------------------------|----------------------|---------------------------|
| <b>Lab conditions</b>               |                           |                      |                           |
| Guidance of lab operations          | Exploratory research      | Exploratory research | Exploratory research      |
| Trained personal                    | Yes                       | Yes                  | Yes                       |
| Accreditation of the lab            | No                        | No                   | No                        |
| Participation to proficiency panels | Yes CIP and CIC           | Yes, CIP and CIC     | Yes, CIP                  |
| Status of protocols                 | Established lab protocols | SOPs                 | Established lab protocols |
| Status of assays                    | Qualified                 | Qualified            | Qualified                 |

FBS = fetal bovine serum; HI = heat- inactivated; mAb = monoclonal antibody; Strep = streptavidin; Lymphos = lymphocytes

n.a. = not applicable; RT = room temperature;

Supporting Information Figure S1.

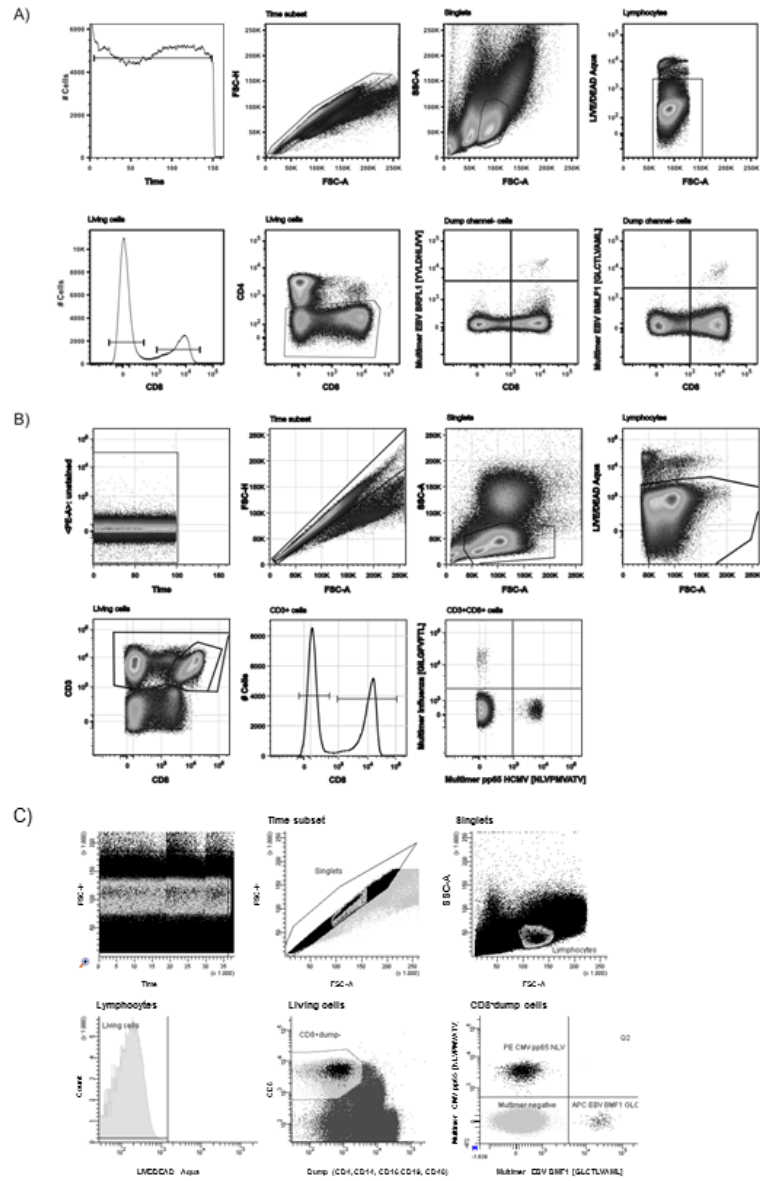

Supporting Information Figure S2.

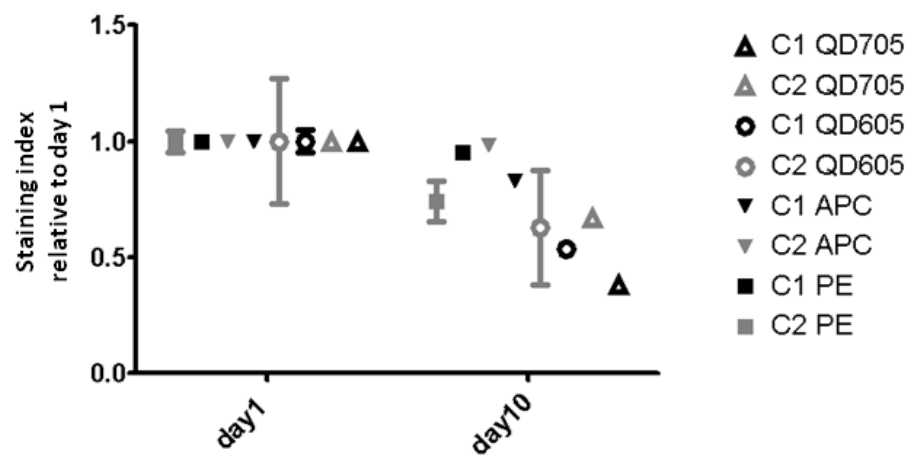

Supporting Information Figure S3.

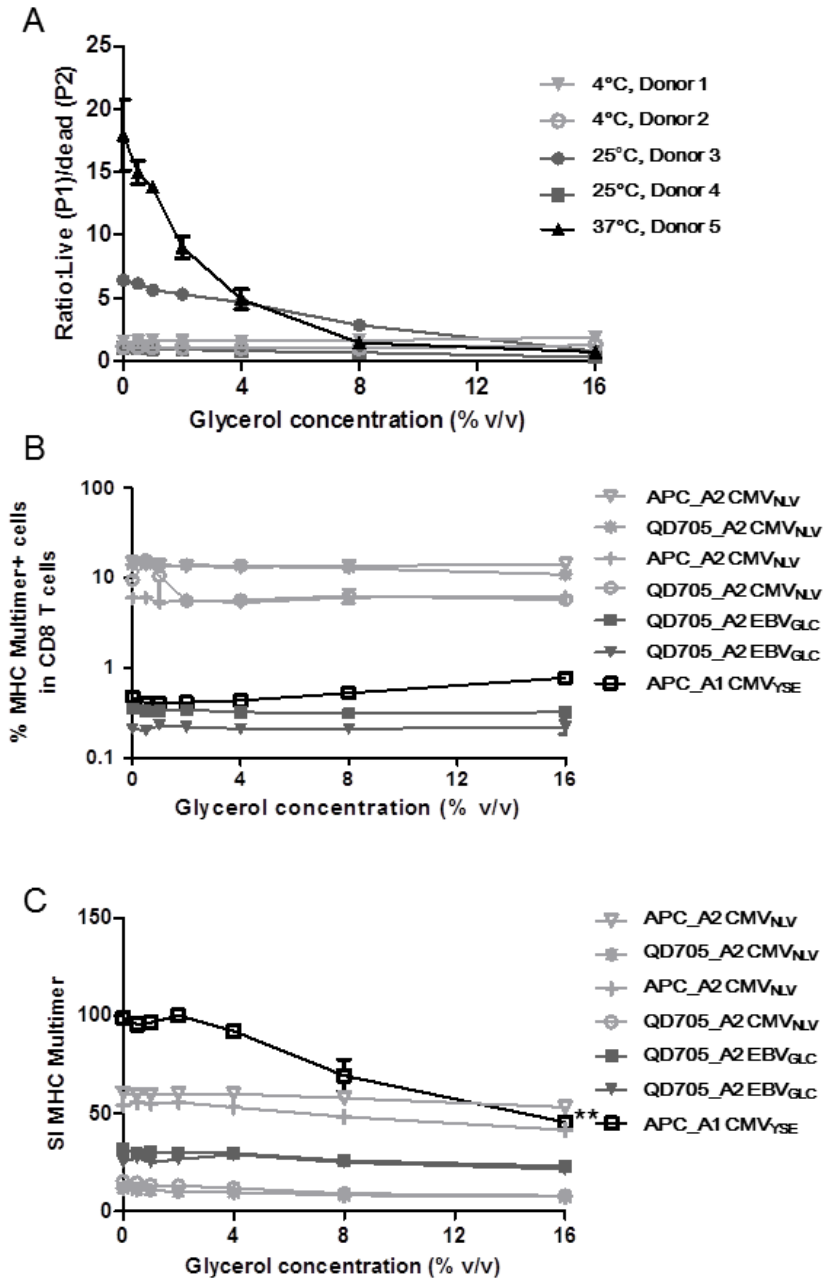



Supporting Information Figure S4.

A

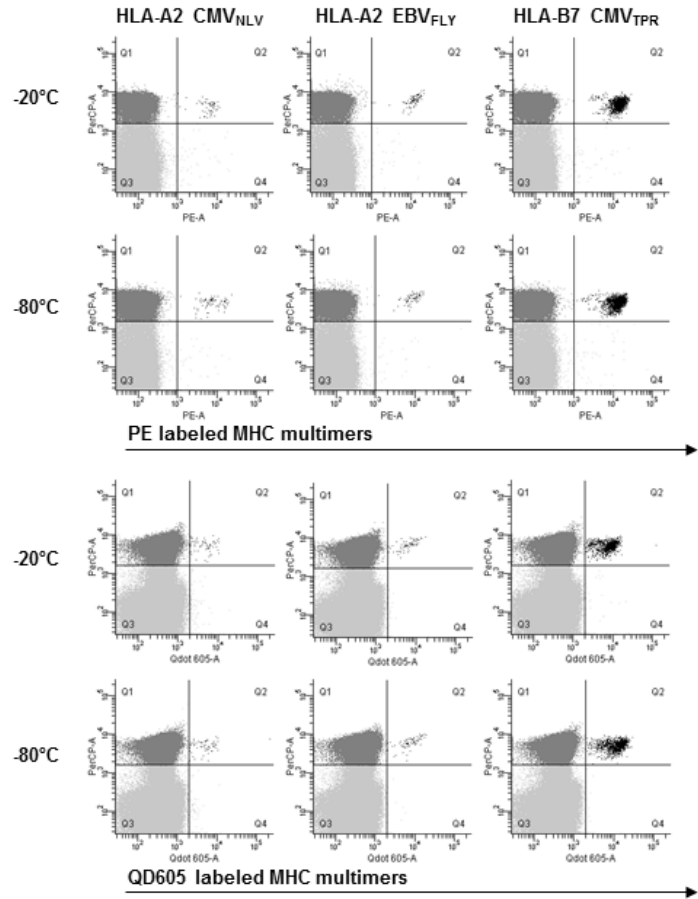

B

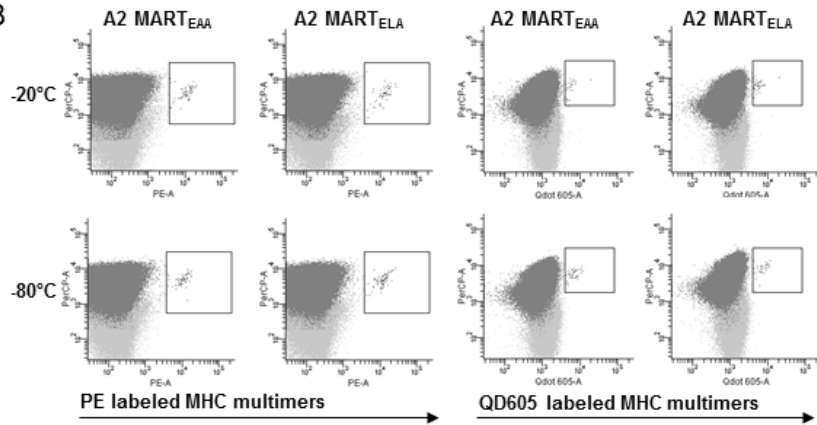

Supporting Information Figure S5.

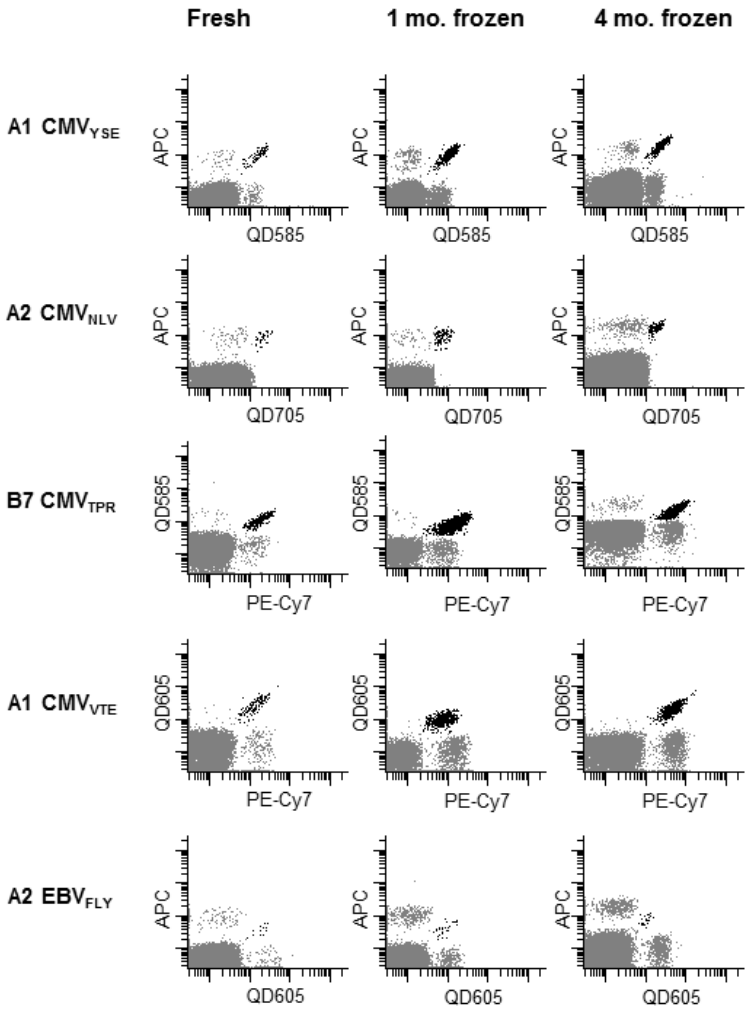

Supporting Information Figure S6.

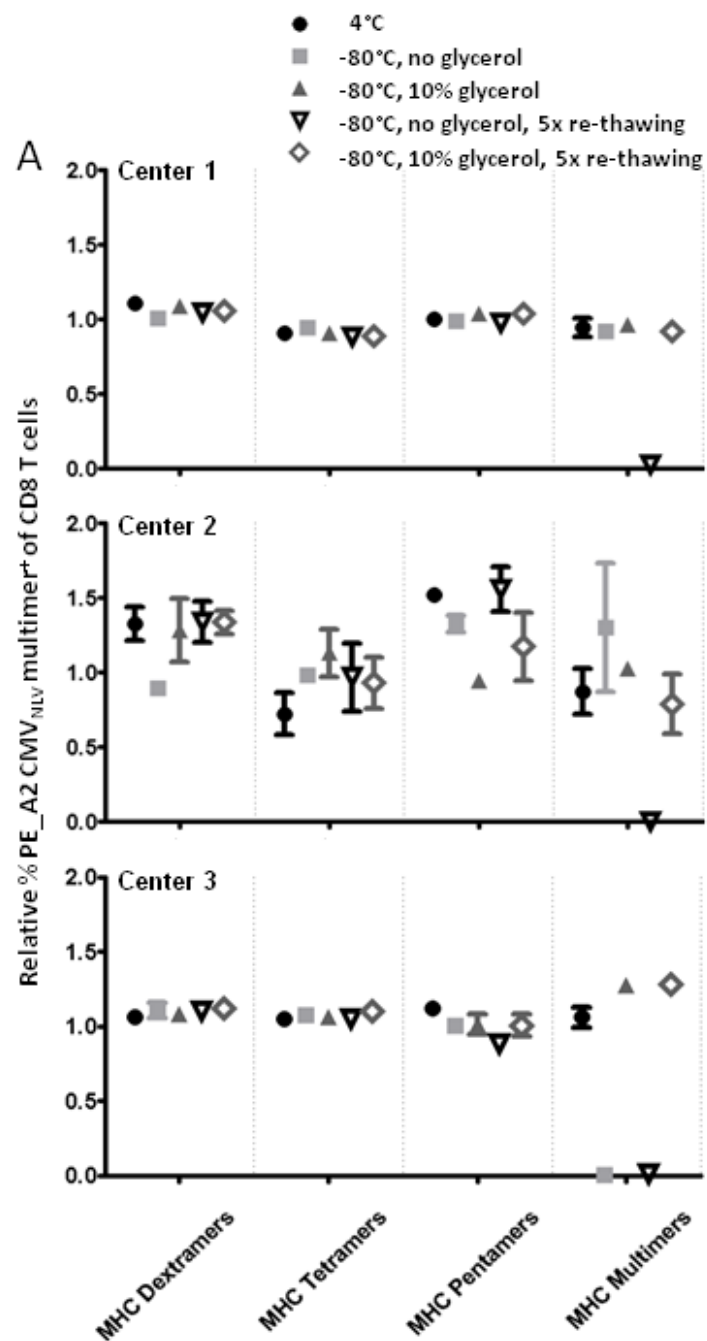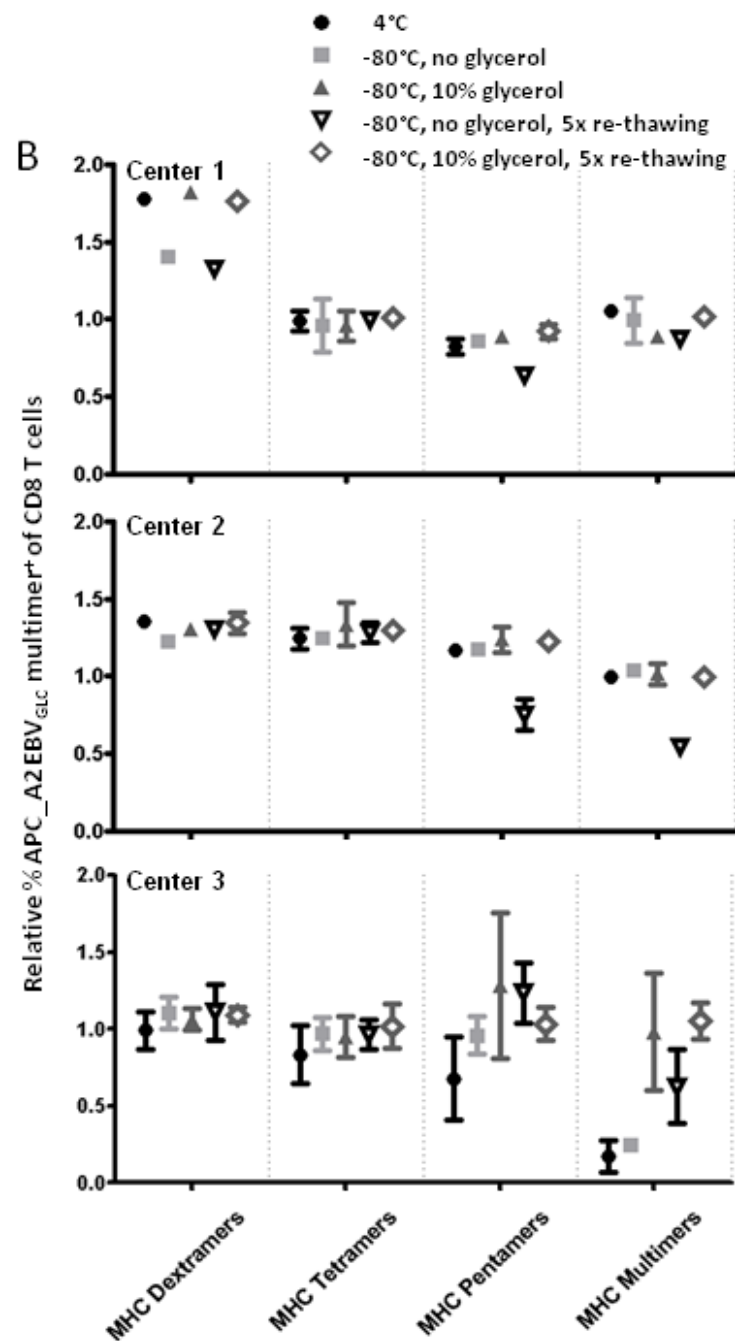

### **Supporting Information figure legends:**

Figure S1. **Gating strategies** of the three centers for identification of CD8 T cells and MHC multimer+ T cells.

Figure S2: **MHC multimer staining after 4°C storage.** MHC multimers, HLA-A2 CMV<sub>NLV</sub> coupled to Streptavidin PE or QD605 and HLA-A2 EBV<sub>GLC</sub> coupled to Streptavidin APC or QD705 were stored at 4°C for 10 days without glycerol. The effect of storage time is depicted as the average staining index for the multimer specific T-cell population calculated relative to the average staining index at day 1 after multimerisation. These tests were performed as two independent experiments at two different Centers (C1, C2). Error bars show range of duplicates.

Figure S3: **Effect of glycerol on cell viability and cell staining.** Increasing concentrations of glycerol (0, 0.5, 1, 2, 4, 8, 16%) were added to the first step of the pMHC multimer staining. pMHC multimers were freshly prepared and contained no glycerol themselves. The effect of glycerol addition was tested on five different donors (Center 2: light grey, two donors, Center 1: dark grey, two donors, Center 3: black, one donor). A) Cell viability under different staining conditions. The ratio between P1 (living cell numbers) and P2 (dead cell numbers) when separated according to their FSC/SSC profile, without the use of a dead-cell marker. The majority of P2 would normally fall out of the lymphocytes gate as given in Fig. 2. Three different incubation temperatures were used for the staining step with multimers, as per local protocols. B and C) MHC multimer staining in terms of percentage and intensity (SI) for seven different virus-specific T-cell populations. All data points are the average of duplicates, error bars indicate range (often not visible).

Figure S4: **Dot plots** relating to the experiment plotted in Figure 4C showing MHC multimer<sup>+</sup> T cell populations after staining of PBMC or TIL with MHC multimers cryopreserved at -20°C or -80°C for 6 months. A) Dot plots are depicted for one donor, showing T cells binding to A2 CMV<sub>NLV</sub>, A2 EBV<sub>FLY</sub> or B7 CMV<sub>TPR</sub> multimers labeled with PE or QD605. B) Dot plots are depicted for one TIL culture, showing T cells binding to A2 MART<sub>EAA</sub> or A2 MART<sub>ELA</sub> multimers labeled with PE or QD605.

Figure S5: **Dot plots** relating to the experiment plotted in Figure 5. Representative dot plots for the 5 different MHC multimer<sup>+</sup> T-cell populations detected in Donor 2: APC/QD605\_A2 EBV<sub>FLY</sub>, APC/QD705\_A2 CMV<sub>NLV</sub>, APC/QD585\_A1 CMV<sub>YSE</sub>, QD605/PE-Cy7\_A1 CMV<sub>VTE</sub>, QD585/PE-Cy7\_B7 CMV<sub>TPR</sub>.

Figure S6. **Testing of different storage conditions for commercially available and in-house generated MHC-multimers.** We measured the frequency of the MHC multimer<sup>+</sup> T cell populations in total CD8 T cells after staining using three different commercial available MHC multimers: MHC dextramers (Immudex), MHC tetramers (TCMetrix), and MHC pentamers (ProImmune), in parallel with in-house produced MHC multimers from the three different centers. MHC multimers PE\_A2 CMV<sub>NLV</sub> and APC A2\_EBV<sub>GLC</sub> were included and tested shortly after purchase and following 10 days storage under the indicated conditions. A) The frequency of PE\_A2 CMV<sub>NLV</sub> positive T cells at day 10 calculated relative to the SI at day 1, respectively shown for the different storage conditions, separately for each of the three centers. B) The frequency of APC A2\_EBV<sub>GLC</sub> positive T cells at day 10 calculated relative to the SI at day 1, respectively shown for the different storage conditions, separately for each of the three centers. Performed as three

independent, but parallel experiments at Centers 1-3. Each dot is the average of duplicates except staining with the MHC dextramers for Center 1, and error bars indicate range (often not visible).

**Cytometry Part A**  
**Author Checklist: MIFlowCyt-Compliant Items**  
**Hadrup et al. Cryopreservation of MHC multimers**  
**- Recommendations for quality assurance in detection of antigen specific T cells**

**Requirement**

1.1. Purpose

**Please Include Requested Information**

Purpose of the study was to establish optimal freezing conditions for long-term storage of peptide-MHC class I multimers. Hypothesis was that HLA-multimers are unstable when stored for longer period of time at 4°C and that albumin and glycerol can be used as cryoprotectors.

1.2. Keywords

MHC multimer; Long term storage; Cryopreservation; quality assurance; glycerol

1.3. Experiment variables

Experiments were performed at 3 different labs using local reagents, protocols and cytometers.

1. Cells were stained with a combination of monoclonal antibodies, dead cell marker and fluorescent HLA-multimers for detecting antigen-specific CD8 T cells.

Both % and staining indexes of HLA-multimer binding CD8 cells were determined. In some experiments, cell viability and % and staining indexes of CD8 cells were assessed

- HLA-multimers specificities: altogether 13 different multimers were included, refolded with 13 different epitopes derived from viral proteins (CMV, EBV, Flu) or tumor-associated antigens (MelanA, Tyrosinase) and restricted by 3 HLA-class I alleles (Table S2).

- HLA-multimer labelling: altogether 10 different fluorochromes were tested

- Antibodies/markers: at least a CD8 antibody was systematically included, together with a dump channel and a dead cell dye (Table S1)

2. HLA-multimers freezing conditions

- Temperature: -20°C and -80°C

- Glycerol concentration in the freezing buffer: serial dilutions ranging from min 0% to max. 16% glycerol.

- Freezing duration: time points ranging from 1 day up to 12 months

1.4. Organization name and address

1. Center for Cancer Immune Therapy (CCIT), Dept. of Hematology, University Hospital Herlev, Denmark

2 Immatics Biotechnologies GmbH, Tübingen, Germany

3 Institute for Cell Biology, Dept. of Immunology, University of Tübingen, Germany

4 Translational Oncology, University Medical Center, Johannes Gutenberg-University gGmbH, Mainz, Germany

5 Department of Clinical Oncology, Leiden University Medical Center, Leiden, The Netherlands

Sine Reker Hadrup, email: [Sine.Reker.Hadrup@regionh.dk](mailto:Sine.Reker.Hadrup@regionh.dk)

1.5. Primary contact name and email address

1.6. Date or time period of experiment

From October 2010 to July 2014

1.7. Conclusions

Long term storage of HLA-multimers is possible when using albumin and glycerol and should contribute to quality assurance of long-term immunomonitoring studies.

Recommendations for cryopreservation were formulated (Table 1)

1.8. Quality control measures

Labs operate with qualified assays using established protocols or SOP

Series of experiments were performed at least at two different centers (except for Fig 5). Each figure is based on

| <p>2.1.1.1. (2.1.2.1., 2.1.3.1.) Sample description</p> <p>2.1.1.2. Biological sample source description</p>       | <p>results obtained with at least in 2 donors and includes different multimers (specificities and fluorescent labelling). Most tests were performed in duplicates. Details are given in the respective figures' legends. Results are reported according to the framework for Minimal Information About T-cell Assays. Statistical analyses were performed when relevant.</p> <p>Samples were human peripheral blood mononuclear cells from healthy volunteers and tumor infiltrating lymphocytes from melanoma patients</p> <p>PBMC were isolated by density gradient from leukaphereses of buffy coats and frozen. TILs were obtained after mechanical tissue disruption, in vitro culture including a rapid expansion step (see Materials and Methods), and freezing.</p> <p>All donors were HLA-typed.</p> <p>All human biological material used in relation to this study was collected for research purposes under informed written consent and approval by the local ethics committee.</p> |                  |              |           |              |  |  |  |  |
|--------------------------------------------------------------------------------------------------------------------|--------------------------------------------------------------------------------------------------------------------------------------------------------------------------------------------------------------------------------------------------------------------------------------------------------------------------------------------------------------------------------------------------------------------------------------------------------------------------------------------------------------------------------------------------------------------------------------------------------------------------------------------------------------------------------------------------------------------------------------------------------------------------------------------------------------------------------------------------------------------------------------------------------------------------------------------------------------------------------------------------|------------------|--------------|-----------|--------------|--|--|--|--|
| <p>2.1.1.3. Biological sample source organism description</p> <p>2.1.2.2. Environmental sample location</p>        | <p>Human</p> <p>Samples were obtained from the Center for Clinical Transfusion Medicine of the Tübingen University Hospital (Germany) and at the Department of Clinical Immunology and Blood Bank of Herlev Hospital (Denmark), as well as from internally produced tumor infiltrating lymphocyte cultures (IM Svane, Herlev Hospital, Denmark).</p>                                                                                                                                                                                                                                                                                                                                                                                                                                                                                                                                                                                                                                             |                  |              |           |              |  |  |  |  |
| <p>2.3. Sample treatment description</p>                                                                           | <p>Cell samples were thawed and directly used for staining according to given protocols (Table S1). HLA-multimers were aliquoted and either preserved at 4°C (fridge) or frozen at -20°C or -80°C with or without albumin glycerol at tested concentrations. For stability experiments, aliquots were subjected to successive cycles of thawing (on ice) and freezing, at a min. of 1 day interval.</p>                                                                                                                                                                                                                                                                                                                                                                                                                                                                                                                                                                                          |                  |              |           |              |  |  |  |  |
| <p>2.4. Fluorescence reagent(s) description</p>                                                                    | <p>All reagents i.e. monoclonal antibodies, HLA-multimer and dead cell dyes are described in details in Table S1</p> <p>CD8 T cells were identified as:</p> <ul style="list-style-type: none"> <li>• CD4 neg (HP2/6 FITC) CD8 pos (CD8 SFCI21Thy2D3 -PE-Cy7) or</li> <li>• CD3 pos (UCHT1 Pacific Blue) CD8 pos SK1 FITC)</li> <li>• Dump CD4(SK3) CD14 (MφP9) CD16 (NKP15) CD19 (4G7) CD40 (LOB7/6) neg (all FITC) CD8 pos (HIT-8a AF700)</li> <li>• Dump CD4(SK3) CD14(MφP9), CD16(NKP15), CD19(4G7), CD40(LOB7/6) neg (all FITC) CD8 pos (HIT8a AF700 or SK1 PerCP)</li> </ul> <ol style="list-style-type: none"> <li>1. Antigen-specific CD8 cells were stained with HLA-multimers labelled with PE, APC, PE-Cy7, QD565, QD585, QD605, QD625, QD655, QD705 and-QD800. Single or dual-color labelling was used.</li> <li>2. Viability was assessed by exclusion of cells labelled with AquaLive/Dead or near IR</li> </ol>                                                                    |                  |              |           |              |  |  |  |  |
| <p>3.1. Instrument manufacturer</p> <p>3.2. Instrument model</p> <p>3.3. Instrument configuration and settings</p> | <p>BD Biosciences</p> <p>Canto II or LSR-II SORP</p> <ul style="list-style-type: none"> <li>• Configuration of the Canto II, Center 1</li> </ul> <table border="1" data-bbox="616 1364 1310 1452"> <thead> <tr> <th>Detector channel</th> <th>Long pass</th> <th>Band pass</th> <th>Fluorochrome</th> </tr> </thead> <tbody> <tr> <td> </td> <td> </td> <td> </td> <td> </td> </tr> </tbody> </table>                                                                                                                                                                                                                                                                                                                                                                                                                                                                                                                                                                                            | Detector channel | Long pass    | Band pass | Fluorochrome |  |  |  |  |
| Detector channel                                                                                                   | Long pass                                                                                                                                                                                                                                                                                                                                                                                                                                                                                                                                                                                                                                                                                                                                                                                                                                                                                                                                                                                        | Band pass        | Fluorochrome |           |              |  |  |  |  |
|                                                                                                                    |                                                                                                                                                                                                                                                                                                                                                                                                                                                                                                                                                                                                                                                                                                                                                                                                                                                                                                                                                                                                  |                  |              |           |              |  |  |  |  |



|                             | filter | filter |                |
|-----------------------------|--------|--------|----------------|
| Violet laser (405 nm, 30mV) |        |        |                |
| A                           | 502LP  | 510/50 | LIVE/DEAD aqua |
| A                           | 595LP  | 605/15 | QD605          |
| Alternative                 |        |        |                |
| B                           | -      | 450/50 | -              |
| B                           | 502LP  | 510/50 | LIVE/DEAD Aqua |
| Alternative                 |        |        |                |
| C                           | -      | -      | -              |
| Blue laser (488 nm, 20mV)   |        |        |                |
| A                           | 735LP  | 780/60 | PE-Cy7         |
| B                           | 655LP  | 670LP  | -              |
| B                           | 655LP  | 710/40 | QD705          |
| Alternative                 |        |        |                |
| C                           | -      | 610LP  | -              |
| D                           | 556LP  | 585/42 | PE             |
| E                           | 502LP  | 530/30 | FITC           |
| F                           | -      | 488/10 | SSC            |
| G                           | -      | -      | -              |
| Red laser (633 nm, 20mV)    |        |        |                |
| A                           | 735LP  | 780/60 | -              |
| B                           | -      | 685LP  | -              |
| C                           | -      | 660/20 | APC            |

- Configuration of the SORP LSR II, Center 2

---

Violet laser (405 nm, 100mV)

---

|   |       |        |              |
|---|-------|--------|--------------|
| A | 735LP | 780/60 | QD800        |
| B | 670LP | 710/50 | QD705        |
| C | 635LP | 660/20 | QD655        |
| D | 615LP | 625/15 | QD625        |
| E | 595LP | 605/40 | QD605        |
| F | 570LP | 585/15 | QD585        |
| G | 557LP | 560/40 | QD565        |
| H | -     | 450/50 | Pacific Blue |

---

Blue laser (488 nm, 100mV)

---

|   |           |            |      |
|---|-----------|------------|------|
| A | 635L<br>P | 685/<br>35 | -    |
| B | 505L<br>P | 510/<br>20 | FITC |
| C | -         | 488/10     | SSC  |

---

Green laser (532 nm, 150mV)

---

|   |       |        |    |
|---|-------|--------|----|
| A | 735LP | 780/60 | -  |
| B | 685LP | 710/50 | -  |
| C | 635LP | 670/14 | -  |
| D | 600LP | 610/20 | -  |
| E | -     | 575/26 | PE |

| Red laser (633 nm, 20mV) |       |        |                 |
|--------------------------|-------|--------|-----------------|
| A                        | 755LP | 780/60 | Near-IR         |
| B                        | 690LP | 710/50 | Alexa Fluor 700 |
| C                        | -     | 670/14 | APC             |
| Alternative C            | -     | 670/30 | APC             |

- Configuration of SORP LSR II, Center 3

| <b>Detect or channel</b>     | <b>Long pass filter</b> | <b>Band pass filter</b> | <b>Fluorochrome</b> |
|------------------------------|-------------------------|-------------------------|---------------------|
| UV laser (355 nm, 60mV)      |                         |                         |                     |
| A                            | 770LP                   | 800/30                  | Qdot800             |
| B                            | 680LP                   | 710/50                  | Qdot705             |
| C                            | 595LP                   | 605/12                  | Qdot605             |
| D                            | 535LP                   | 580/30                  | Qdot585             |
| Violet laser (405 nm, 100mV) |                         |                         |                     |
| A                            | 635LP                   | 655/8                   | Qdot655             |
| B                            | 610LP                   | 625/20                  | Qdot625             |
| C                            | -                       | 450/50                  | -                   |
| Blue laser (488, 100mV)      |                         |                         |                     |
| A                            | 660LP                   | 695/40                  | PerCP               |
| B                            | 505LP                   | 525/50                  | FITC                |

|                                   |       |        |                 |
|-----------------------------------|-------|--------|-----------------|
| C                                 | -     | 488/10 | SSC             |
| Yellow-green laser (561 nm, 50mV) |       |        |                 |
| A                                 | 735LP | 780/60 | PE-Cy7          |
| B                                 | 685LP | 710/50 | -               |
| C                                 | 635LP | 670/30 | -               |
| D                                 | 600LP | 610/20 | -               |
| E                                 | 570LP | 585/15 | PE              |
| Red laser (640 nm, 40mV)          |       |        |                 |
| A                                 | 735LP | 780/60 | Near-IR         |
|                                   | 710LP | 725/50 | Alexa Fluor 700 |
| C                                 | -     | 660/20 | APC             |

All: FSC /SSC linear, all fluorescence log amplification  
 Rectangular Quartz Flow Cell

4.1. List-mode data files

\*We recommend all authors to submit their data files to <http://flowrepository.org> and to make them available for the peer-review process. If you have done so, please let us know by inserting the following codes (replace the red text):

1) The link for peer-review process:

<http://flowrepository.org/id/RvFr5O8CfOtHSXyn9CYCoZnOhj77ltgU1hFeJ8vlaYLeB7mOmN3fEXFCuwo2qwX>

2) The repository identifier:

<http://flowrepository.org/id/http://flowrepository.org/id/FR-FCM-ZZEM>

4.2. Compensation description

PMT voltages were adjusted for each fluorescence channel using unstained cells, and compensations set with compensation beads (BD Biosciences or Invitrogen) labeled with antibodies. ArC Amine reactive compensation bead kit (Invitrogen) or dead cells (after exposure to 65°C for 20min) stained with the LIVE/DEAD dye were used for

|                                  |                                                                                                                                                                                                                                                                                                                                                   |
|----------------------------------|---------------------------------------------------------------------------------------------------------------------------------------------------------------------------------------------------------------------------------------------------------------------------------------------------------------------------------------------------|
|                                  | compensating the relevant channel.                                                                                                                                                                                                                                                                                                                |
| 4.3. Data transformation details | Hardware compensation was exclusively applied (Center 2 and 3) or mostly applied (Center 1). Analysis of FCS files was performed with the software BD FACSDiva or Flow Jo. If used, FCS file format was FCS 3.0. Bi-exponential transformation was used when appropriate.                                                                         |
| 4.4.1. Gate description          | Lymphocytes were identified by time histogram, singlets FSC-A/FSC-H and FSC/SSC. Further gating was adapted to the staining mix, including dead cell exclusion (Table S1 and figure legends). Gates or quadrants were used as per lab experience, and could be slightly adapted between experiments and/or samples. Examples are shown in Fig S1. |
| 4.4.2. Gate statistics           | Gate statistics from Flow Jo or Diva were % of dead lymphocytes (Fig2) or dead cells (Fig S2), % of CD8 cells (Fig 2), and % HLA-multimer binding cells within the CD8 subset as well as median fluorescence of multimer positive and multimer neg CD8 cells for calculating staining indexes (Fig1, Fig2, Fig 3, Fig 4, Fig5, Fig S2)            |
| 4.4.3. Gate boundaries           | Example of gate boundaries are shown in Fig1, FigS1, S3 and S4.                                                                                                                                                                                                                                                                                   |
